# Supplementary material
Source: PubMed Central journal article supplement (PMC524056)

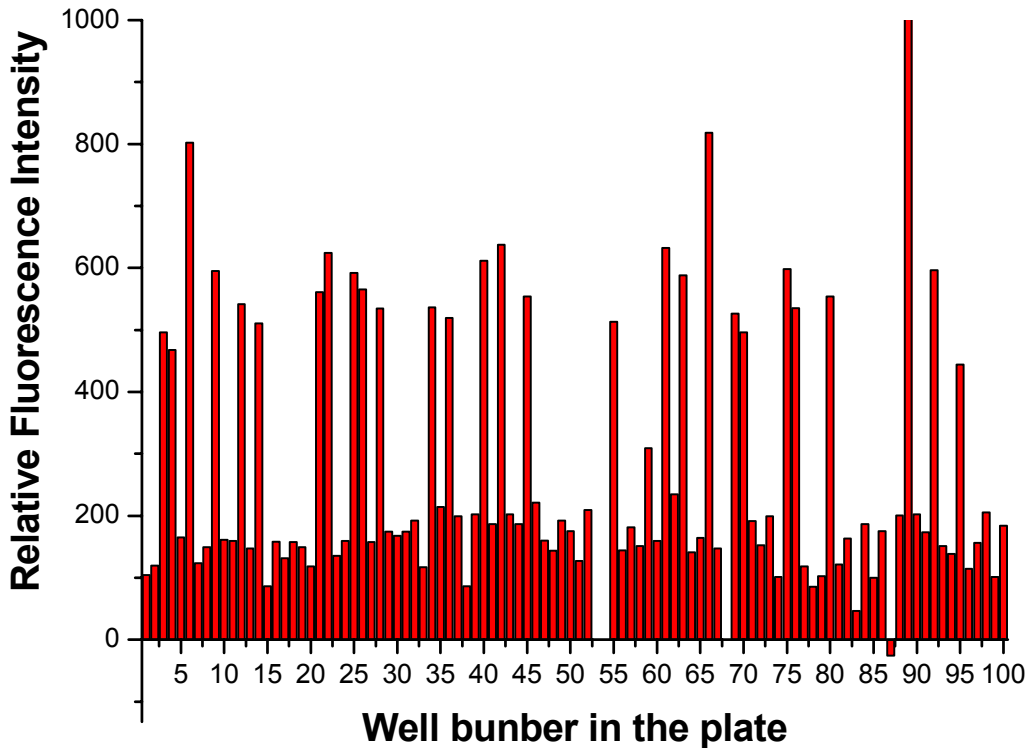

Supplement: pnas_101_42_15027__1.pdf [file pnas_101_42_15027__1.pdf]
